# Supplementary material
Source: Springer Nature journal article supplement (https://www.springermedizin.de/resource/supplementary/12986_2010_277_MOESM4_ESM.pdf/25655740)

**4a**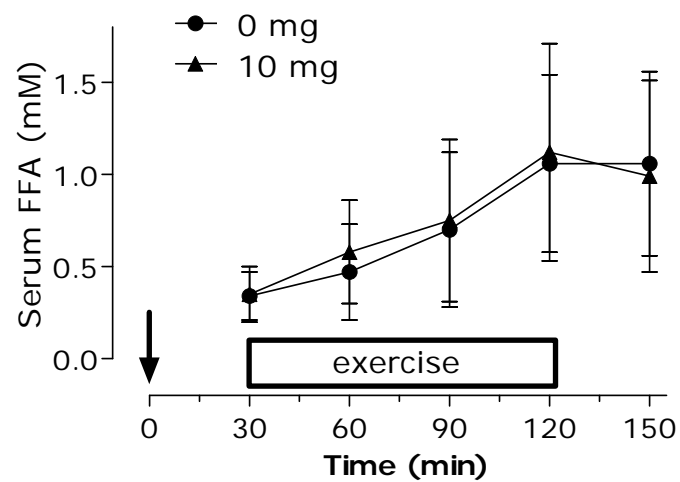**4b**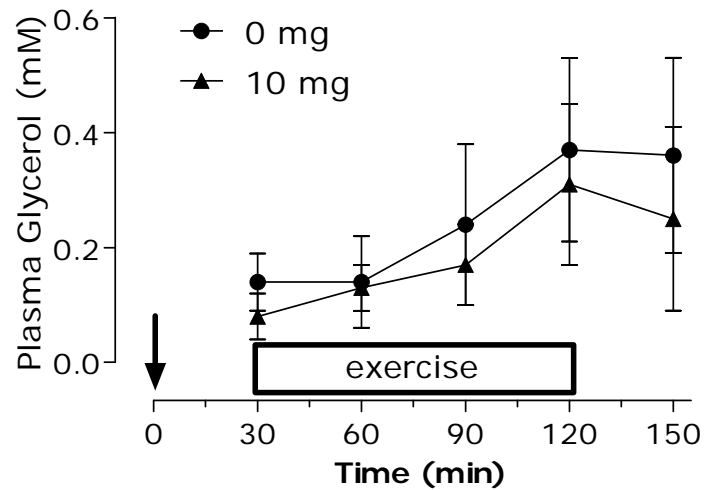**4c**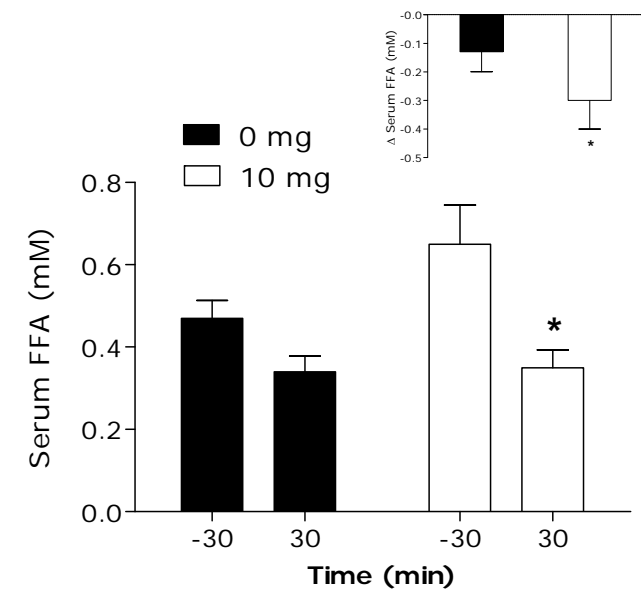**4d**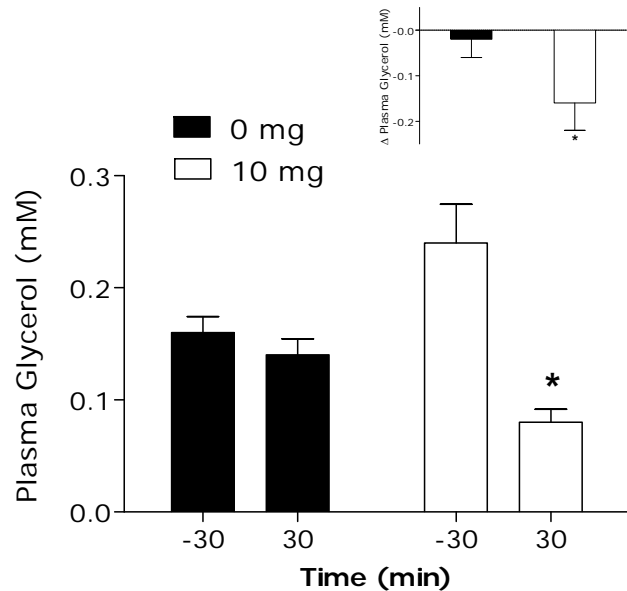

Supplement: MOESM4 [file 25655740]
